# Supplementary material for: Predicting value of white cell count and total bilirubin on clinical outcomes in patients with ST-elevation myocardial infarction following percutaneous coronary intervention: a cohort study
Source: PubMed Central journal article supplement — BMJ Open. 2020 Feb 18;10(2):e031227. doi: 10.1136/bmjopen-2019-031227 (PMC7044918; doi:10.1136/bmjopen-2019-031227), 2020-02-18
Supplement: bmjopen-2019-031227supp001.pdf [file bmjopen-2019-031227supp001.pdf]

**The combined value of white blood cell and total bilirubin predict clinical outcomes in patients with ST-elevation myocardial infarction following percutaneous coronary intervention: a cohort study**

**Supplementary materials**

Munire-Tuxun, MD., Qian Zhao, PhD., Yang Xiang, MD., Fen Liu, PhD., Chun-Fang Shan, MD., Xin-Rong Zhou, MD., Ning Song, PhD., Ajiguli-Waisiding, MD., Xue-He, Zhang, MD., Gulandanmu-Aihemaiti, MD., Yi-Ning Yang, PhD., Xiao-Mei Li, PhD.

**Supplementary Table S1 Comparison between in-hospital mortality group and survival group**

| <b>Variables</b>           | <b>Survival<br/>group(n=598)</b> | <b>Mortality<br/>group(n=17)</b> | <b><i>t/χ<sup>2</sup></i></b> | <b><i>P</i></b> |
|----------------------------|----------------------------------|----------------------------------|-------------------------------|-----------------|
| Gender (men) (n,%)         | 516(86.3)                        | 12(70.6)                         | 3.550                         | 0.067           |
| Age ( years)*              | 58.03±12.15                      | 63.53±12.40                      | 1.839                         | 0.066           |
| BMI (kg/m <sup>2</sup> )   | 25.42±3.25                       | 24.01±2.68                       | 1.785                         | 0.075           |
| Smoking history (n,%)      | 338(56.5)                        | 11(64.7)                         | 0.451                         | 0.502           |
| Hypertension (n,%)         | 269(49.5)                        | 8(47.1)                          | 0.039                         | 0.843           |
| Diabetes (n,%)             | 125(20.9)                        | 3(17.6)                          | 0.106                         | 0.744           |
| Hyperlipemia (n,%)         | 443(74.1)                        | 14(82.4)                         | 0.593                         | 0.441           |
| SBP (mmHg)                 | 121.59±18.89                     | 119.76±23.65                     | 0.378                         | 0.706           |
| DBP (mmHg)                 | 76.46±13.08                      | 74.18±15.91                      | 0.707                         | 0.480           |
| Heart rate (/min)          | 81.90±13.88                      | 90.06±23.31                      | 2.333                         | 0.020           |
| LVEF(%)*                   | 58.33±6.67                       | 51.35±8.41                       | 4.222                         | <0.001          |
| TB (umol/L)*               | 13.69±5.22                       | 18.47±5.59                       | 3.718                         | <0.001          |
| DBL (umol/L)               | 2.18±1.56                        | 2.58±2.10                        | 1.025                         | 0.306           |
| IBL (umol/L)               | 11.88±5.09                       | 12.29±4.41                       | 0.326                         | 0.744           |
| TC (mmol/L)                | 4.41±1.18                        | 3.95±0.95                        | 1.611                         | 0.108           |
| TG(mmol/L)                 | 2.05±1.39                        | 1.67±1.06                        | 1.095                         | 0.274           |
| LDL (mmol/L)               | 2.86±0.85                        | 2.51±0.90                        | 1.686                         | 0.092           |
| HDL (mmol/L)               | 1.03±0.35                        | 0.90±0.24                        | 0.415                         | 0.678           |
| CKMB (U/L)                 | 281.46±220.92                    | 275.36±139.69                    | 0.113                         | 0.910           |
| WBC (×10 <sup>9</sup> /L)* | 10.54±3.04                       | 14.59±4.74                       | 5.324                         | <0.001          |
| Hb (g/L)                   | 144.99±20.35                     | 141.59±24.81                     | 0.676                         | 0.500           |
| PLT (×10 <sup>9</sup> /L)  | 222.58±60.33                     | 207.59±60.52                     | 1.010                         | 0.313           |
| UC (mmol/L)*               | 5.42±1.80                        | 6.40±3.24                        | 2.137                         | 0.033           |
| CR (umol/L)*               | 76.24±19.16                      | 86.46±34.23                      | 2.108                         | 0.035           |
| GRACE                      | 133.06±28.01                     | 148.71±36.61                     | 2.250                         | 0.025           |

|                 |           |           |        |       |
|-----------------|-----------|-----------|--------|-------|
| LM (n,%)        | 54(9.0)   | 1(5.9)    | 0.201  | 0.54  |
| LAD (n,%)       | 518(86.6) | 16(94.1)  | 0.812  | 0.368 |
| LCX (n,%)       | 375(62.7) | 12(70.6)  | 0.440  | 0.507 |
| RAD (n,%)       | 418(69.9) | 15(88.2)  | 2.670  | 0.102 |
| Culprit Vessels | 2.84±1.27 | 3.41±1.42 | 1.840  | 0.066 |
| Medication      |           |           |        |       |
| Aspirin         | 578(96.7) | 14(82.4)  | 9.393  | 0.002 |
| Clopidogrel*    | 553(92.5) | 9(52.9)   | 32.806 | 0.000 |
| β blockers      | 492(82.3) | 11(64.7)  | 3.425  | 0.064 |
| ACEI            | 429(71.7) | 8(47.1)   | 4.896  | 0.027 |
| Statins*        | 559(93.5) | 12(70.6)  | 13.039 | 0.000 |

Abbreviations: BMI, Body mass index; SBP, systolic blood pressure; DBP, diastolic blood pressure; LVEF, Left ventricular ejection fraction; TB, total bilirubin; DBI, direct bilirubin; IBL, indirect bilirubin; TC, total cholesterol; TG, triglycerides; LDL-C, low-density lipoprotein cholesterol; HDL-C, high-density lipoprotein cholesterol; CKMB, creatine kinase isoenzymes; WBC, white blood cells; Hb, hemoglobin; PLT, Platelet; UC, uric acid; CR, creatinine; GRACE, global registry of acute coronary events; LM, left main coronary artery; LAD, left anterior descending branch ; LCX, left circumflex branch; RAD, right coronary descending branch; ACEI, angiotensin-converting enzyme inhibitor.
